# Supplementary figures and images for: The structure and self-regeneration performance of Salix psammophila-activated carbon modified by Ag and N co-doped TiO2
Source: Royal Society of Chemistry journal article supplement (doi:10.1039/c9ra10305h), 2020-01-01

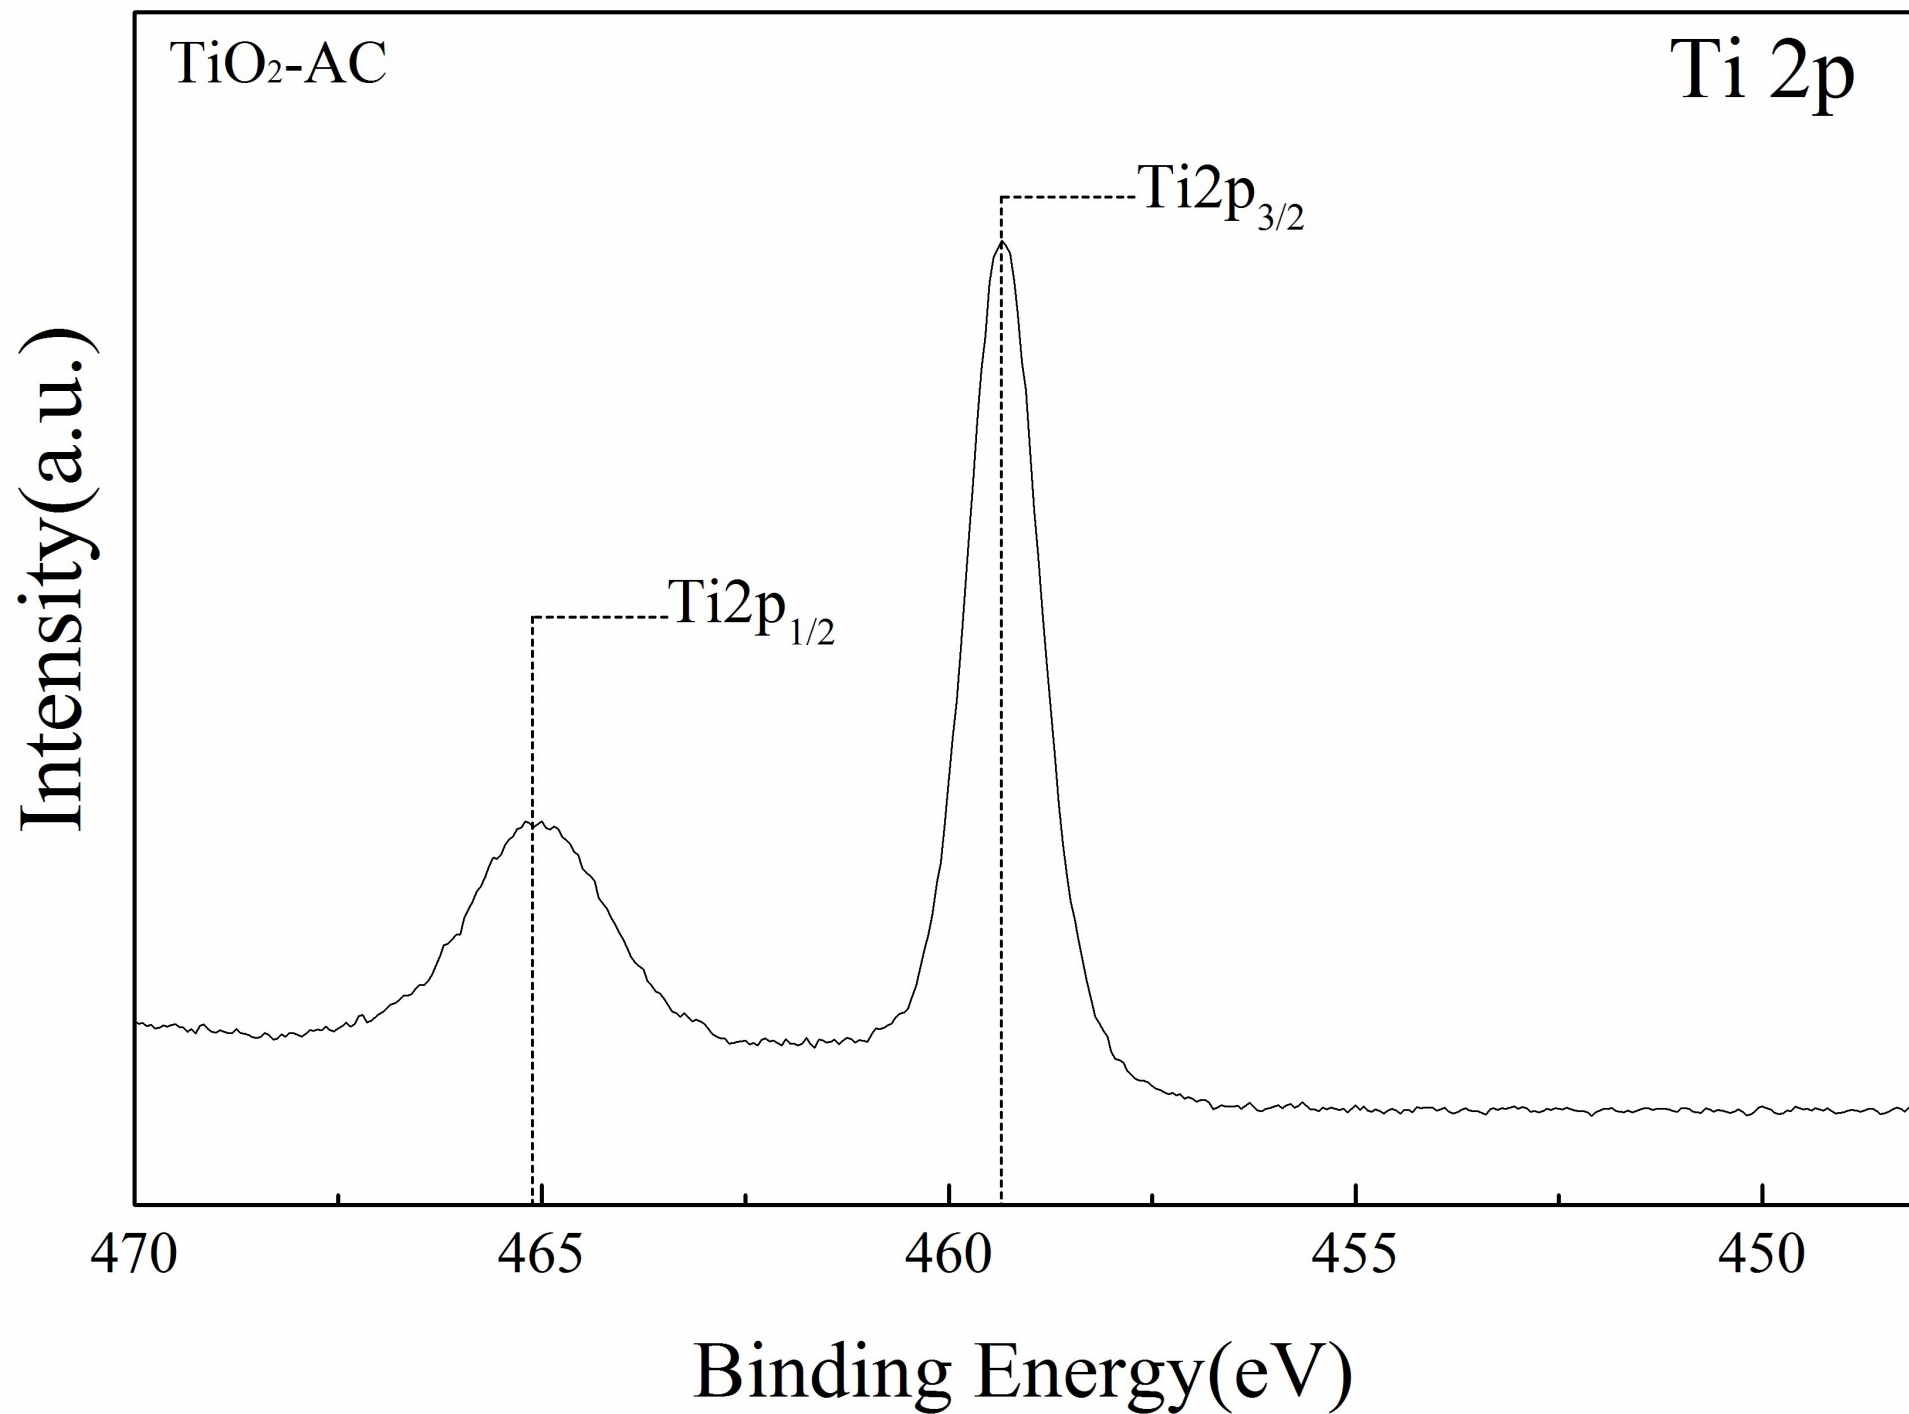

Supplement: c9ra10305h1.pdf [file c9ra10305h1.pdf]
